# Supplementary material for: Spatial separation of the hydrogen evolution center from semiconductors using a freestanding silica-sphere-supported Pt composite
Source: Royal Society of Chemistry journal article supplement (doi:10.1039/c7cp04463a), 2017-01-01
Supplement: c7cp04463a1.pdf [file c7cp04463a1.pdf]

## Supplementary Information

### **Spatial separation of hydrogen evolution center from semiconductor with a freestanding silica-sphere-supported Pt composite**

Guiyang Yu,<sup>a</sup> Wenxiang Zhang,<sup>a</sup> Jungang Cao,<sup>a</sup> Wenfu Yan<sup>b</sup> and Gang Liu<sup>\*a</sup>

<sup>a</sup> Key Laboratory of Surface and Interface Chemistry of Jilin Province, College of Chemistry, Jilin University, Jiefang Road 2519, Changchun, 130012, China

<sup>b</sup> A State Key Laboratory of Inorganic Synthesis and Preparative Chemistry, College of Chemistry, Jilin University, Qianjin Road 2699, Changchun, 130012, China .

\* Address correspondence to [lgang@jlu.edu.cn](mailto:lgang@jlu.edu.cn)

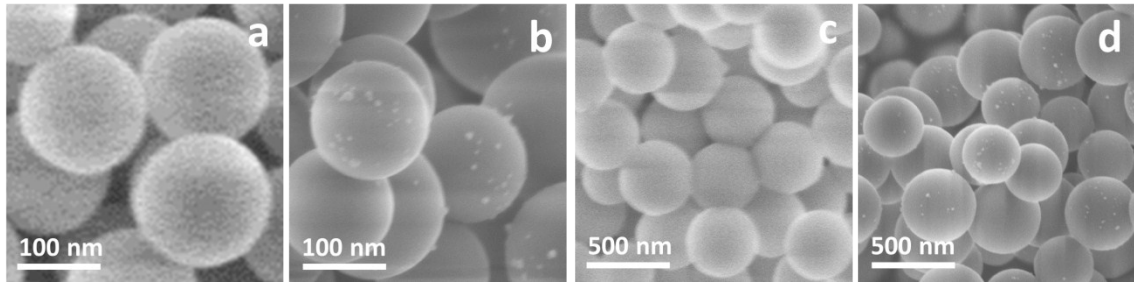

**Fig. S1** SEM images of (a) S120, (b) 1%Pt/S120, (c) S400 and (d) 1%Pt/S400.

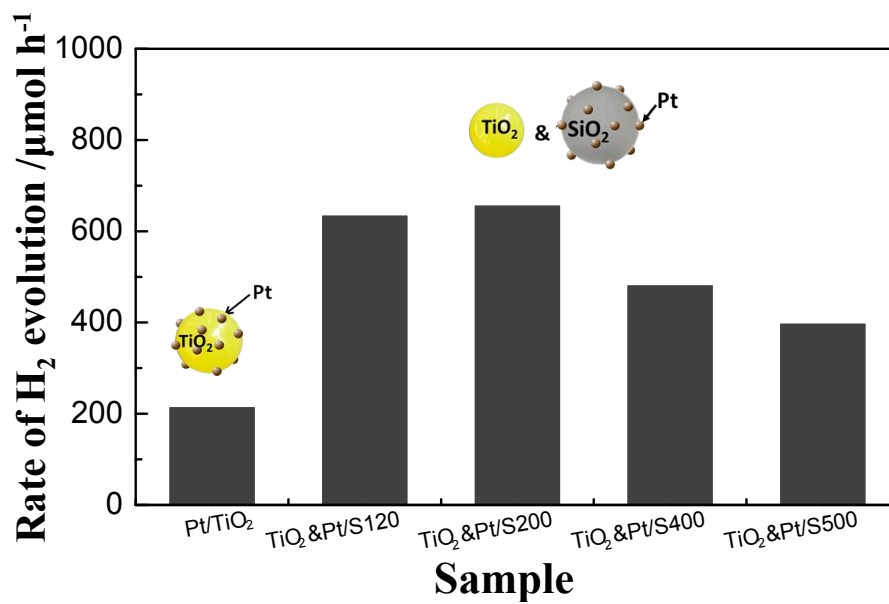

**Fig. S2** Photocatalytic H<sub>2</sub> evolution activity of Pt/TiO<sub>2</sub> and Pt/S120, Pt/S200, Pt/S400, Pt/S500 co-added with TiO<sub>2</sub> under full spectrum irradiation.

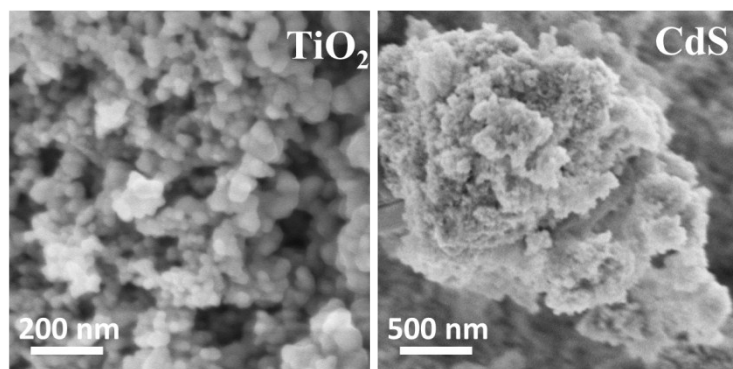

**Fig. S3** SEM images of TiO<sub>2</sub> and CdS.

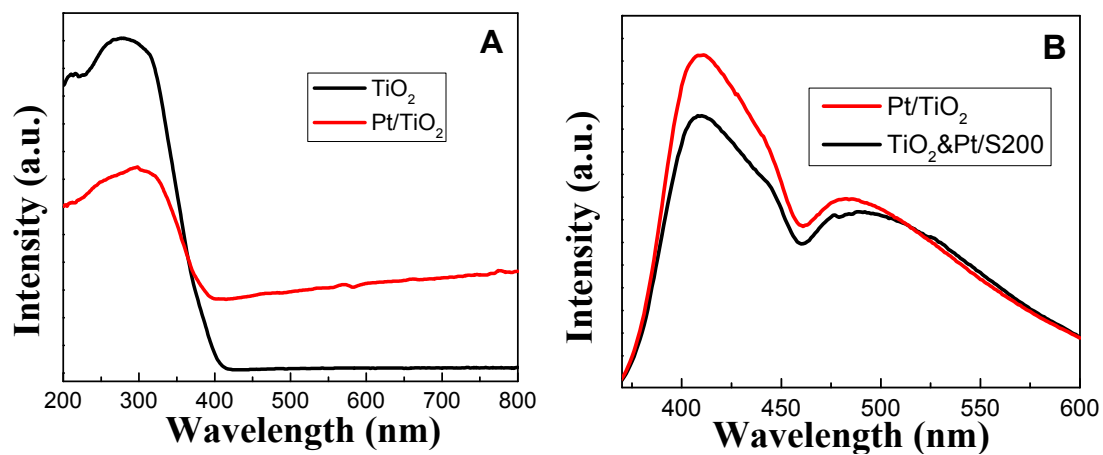

**Fig. S4** (A) UV-vis spectra of TiO<sub>2</sub> and 1.0% Pt/TiO<sub>2</sub>. (B) PL spectra of Pt/TiO<sub>2</sub> and TiO<sub>2</sub>&Pt/S200 suspended in the reaction agents. The excitation wavelength for the emission spectra was 310 nm.

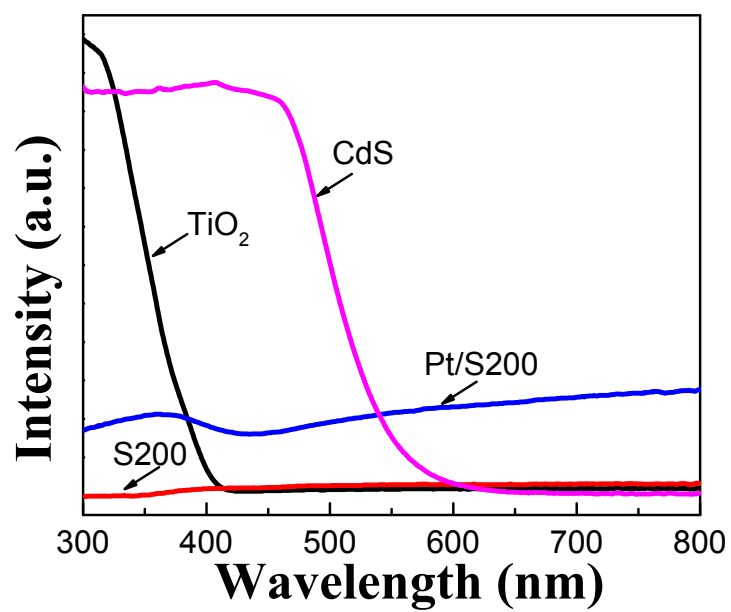

**Fig. S5** UV-vis diffuse reflection spectra of TiO<sub>2</sub>, CdS, S200 and Pt/S200.

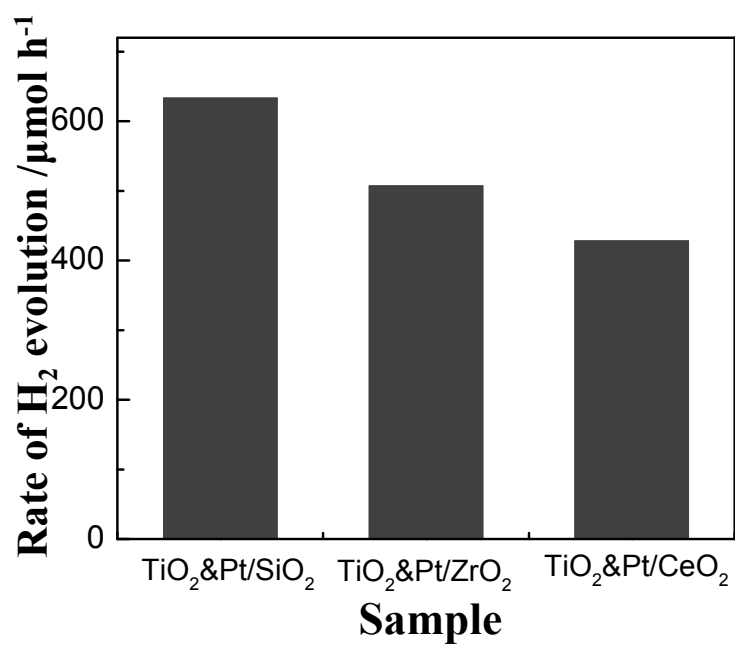

**Fig. S6** Photocatalytic H<sub>2</sub> evolution activity of 1.0% Pt loading on various supports co-added with TiO<sub>2</sub> under full spectrum irradiation.
